# Supplementary material for: Chlorophyll a -specific Δ 14 C, δ 13 C and δ 15 N values in stream periphyton: implications for aquatic food web studies
Source: Copernicus journal article supplement (doi:10.5194/bg-12-6781-2015), 2015-11-26
Supplement: Supplementary file 1 [file bg-12-6781-2015-supplement.pdf]

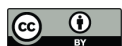

## *Supplement of*

# **Chlorophyll *a*-specific $\Delta^{14}\text{C}$ , $\delta^{13}\text{C}$ and $\delta^{15}\text{N}$ values in stream periphyton: implications for aquatic food web studies**

**N. F. Ishikawa et al.**

*Correspondence to:* N. F. Ishikawa (naoto.f.ishikawa@gmail.com)

The copyright of individual parts of the supplement might differ from the CC-BY 3.0 licence.

## Supplemental tables

Table S1. The  $\delta^{13}\text{C}_{\text{bulk}}$ ,  $\delta^{15}\text{N}_{\text{bulk}}$  and  $\Delta^{14}\text{C}_{\text{bulk}}$  values (‰) and C/N ratios ( $\text{g g}^{-1}$ ) of the samples. PP: primary producer. Means and  $1\sigma$  analytical errors of the repeated measurements are shown.

Table S2. The  $\delta^{13}\text{C}_{\text{chl}}$ ,  $\delta^{15}\text{N}_{\text{chl}}$  and  $\Delta^{14}\text{C}_{\text{chl}}$  values (‰), C/N ratios of purified chlorophyll *a* ( $\text{g g}^{-1}$ ) (theoretical value: 11.8), chlorophyll *a* abundances per unit dry weight of the samples ( $\mu\text{g g}^{-1}$ ) and carbon contents of the chlorophyll *a* samples introduced into the AMS ( $\mu\text{g C}$ ) for periphyton, *Cladophora* sp. and *Q. glauca*. Means and  $1\sigma$  analytical errors of the repeated measurements are shown. Periphyton in April comprises chlorophyll *a* and phaeophytin *a*. The October periphyton  $\delta^{13}\text{C}_{\text{chl}}$  and  $\delta^{15}\text{N}_{\text{chl}}$  values were determined based on single measurement.

## Supplemental figures

Figure S1. Illustration of algae and cyanobacteria in the periphyton community observed in November 2008. White scale bars at bottom right indicate 50  $\mu\text{m}$ .

Figure S2. Microscopic images of a) periphyton and b) the gut contents of *E. latifolium* collected in April 2013. White scale bars at bottom right indicate 100  $\mu\text{m}$ .

Figure S3. Three-dimensional chromatograms of laboratory standards for a) chlorophyll *a*, and b) phaeophytin *a* and periphyton collected from the Seri River in c) April, and d) October 2013.

1 Table S1. The  $\delta^{13}\text{C}_{\text{bulk}}$ ,  $\delta^{15}\text{N}_{\text{bulk}}$  and  $\Delta^{14}\text{C}_{\text{bulk}}$  values (‰) and C/N ratios ( $\text{g g}^{-1}$ ) of the samples.  
2 PP: primary producer. Means and  $1\sigma$  analytical errors of the repeated measurements are  
3 shown.

|                       | $\delta^{13}\text{C}_{\text{bulk}}$ (‰) | $\delta^{15}\text{N}_{\text{bulk}}$ (‰) | C/N ( $\text{g g}^{-1}$ ) | $\Delta^{14}\text{C}_{\text{bulk}}$ (‰) | AMS lab code |
|-----------------------|-----------------------------------------|-----------------------------------------|---------------------------|-----------------------------------------|--------------|
| April                 |                                         |                                         |                           |                                         |              |
| Periphyton            | -20.7 ± 0.0                             | -5.7 ± 0.1                              | 5.9 ± 0.2                 | -228 ± 2.3                              | IAAA-131744  |
| <i>E. latifolium</i>  | -26.6 ± 0.1                             | -3.9 ± 0.3                              | 4.3 ± 0.0                 | -215 ± 2.3                              | IAAA-131743  |
| October               |                                         |                                         |                           |                                         |              |
| Periphyton            | -26.2 ± 1.1                             | -1.7 ± 0.1                              | 6.6 ± 0.5                 | -179 ± 2.2                              | IAAA-140037  |
| <i>E. latifolium</i>  | -26.5 ± 0.2                             | +1.4 ± 2.4                              | 5.0 ± 0.1                 | -199 ± 2.2                              | IAAA-140038  |
| Reference             |                                         |                                         |                           |                                         |              |
| <i>Cladophora</i> sp. | -23.0 ± 1.8                             | -4.3 ± 0.1                              | 11.6 ± 1.0                | -199 ± 2.7                              | IAAA-131745  |
| <i>Q. glauca</i>      | -30.9 ± 0.1                             | -0.8 ± 0.1                              | 28.7 ± 0.8                | +27 ± 2.3                               | IAAA-131749  |

Table S2. The  $\delta^{13}\text{C}_{\text{chl}}$ ,  $\delta^{15}\text{N}_{\text{chl}}$  and  $\Delta^{14}\text{C}_{\text{chl}}$  values (‰), C/N ratios of purified chlorophyll *a* ( $\text{g g}^{-1}$ ) (theoretical value: 11.8), chlorophyll *a* abundances per unit dry weight of the samples ( $\mu\text{g g}^{-1}$ ) and carbon contents of the chlorophyll *a* samples introduced into the AMS ( $\mu\text{g C}$ ) for periphyton, *Cladophora* sp. and *Q. glauca*. Means and  $1\sigma$  analytical errors of the repeated measurements are shown. Periphyton in April comprises chlorophyll *a* and phaeophytin *a*. The October periphyton  $\delta^{15}\text{N}_{\text{chl}}$  value was determined based on single measurement.

|                       | $\delta^{13}\text{C}_{\text{chl}}$ (‰) | $\delta^{15}\text{N}_{\text{chl}}$ (‰) | C/N ( $\text{g g}^{-1}$ ) | $\Delta^{14}\text{C}_{\text{chl}}$ (‰) | $\mu\text{g g}^{-1}$ | $\mu\text{g C}$ | AMS lab code |
|-----------------------|----------------------------------------|----------------------------------------|---------------------------|----------------------------------------|----------------------|-----------------|--------------|
| April                 |                                        |                                        |                           |                                        |                      |                 |              |
| Periphyton            | -20.0 ± 0.2                            | -1.5 ± 0.2                             | 14.3 ± 1.8                | -258 ± 4.8                             | 249                  | 90              | YAUT-012012  |
| October               |                                        |                                        |                           |                                        |                      |                 |              |
| Periphyton            | -25.2 ± 0.6                            | +0.5                                   | 12.2 ± 0.8                | -190 ± 6.1                             | 817                  | 617             | YAUT-005816  |
| Reference             |                                        |                                        |                           |                                        |                      |                 |              |
| <i>Cladophora</i> sp. | -24.7 ± 0.1                            | -6.0 ± 1.2                             | 11.9 ± 0.2                | -210 ± 6.8                             | 429                  | 100             | YAUT-005815  |
| <i>Q. glauca</i>      | -32.0 ± 0.1                            | -0.2 ± 0.4                             | 13.1 ± 2.0                | -10 ± 7.3                              | 465                  | 119             | YAUT-005824  |

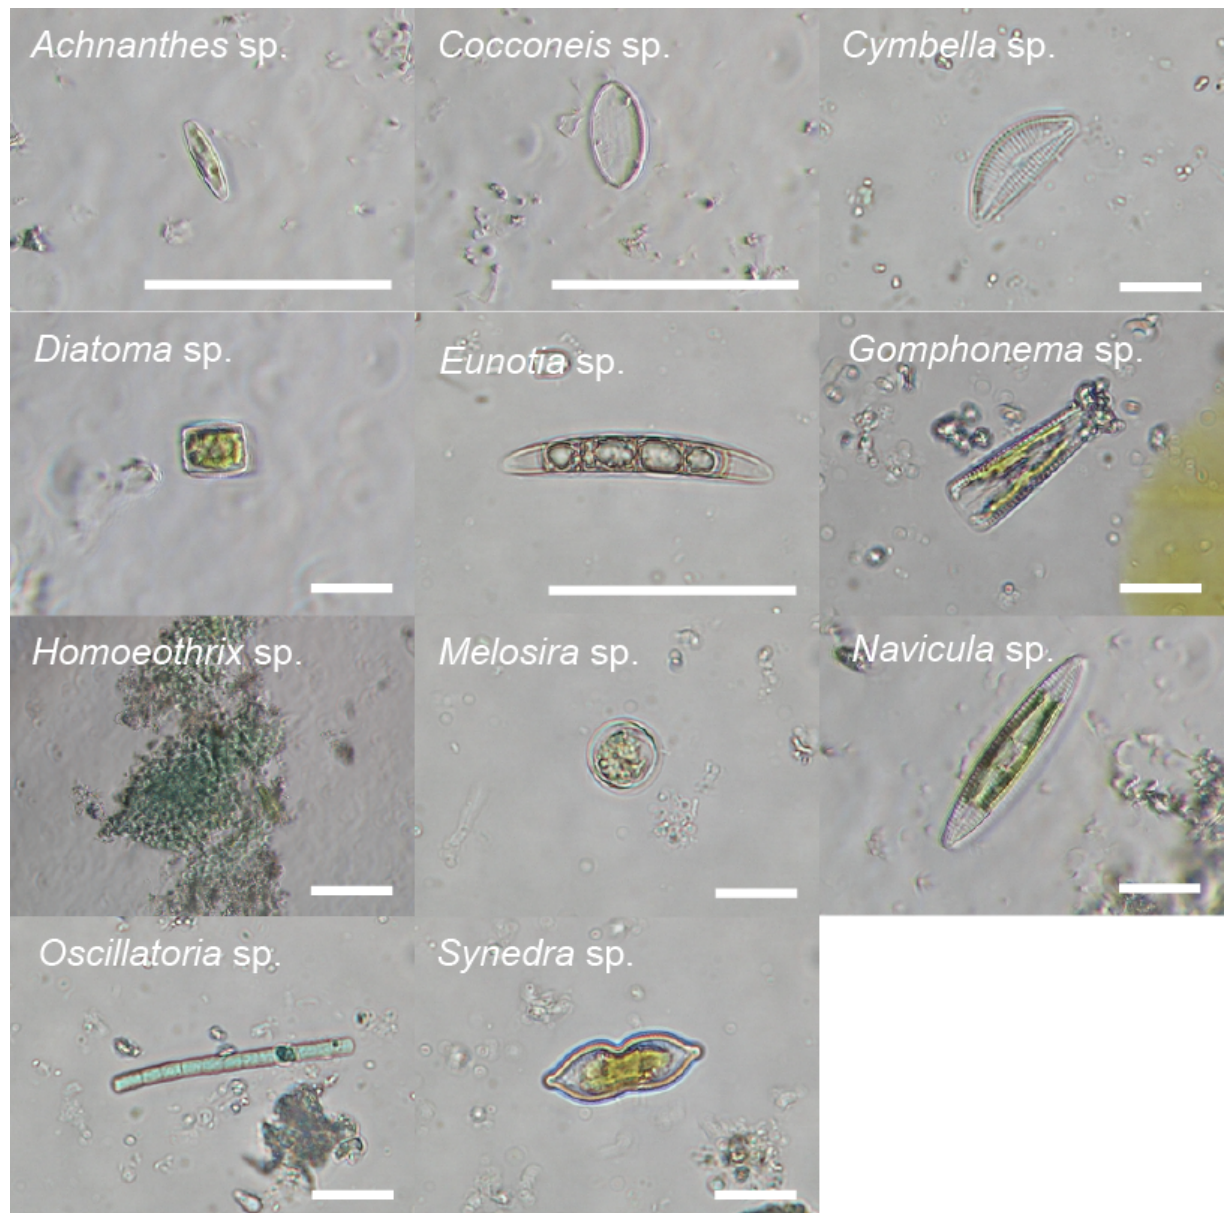

Figure S1. Illustration of algae and cyanobacteria in the periphyton community observed in November 2008. White scale bars at bottom right indicate 50 μm.

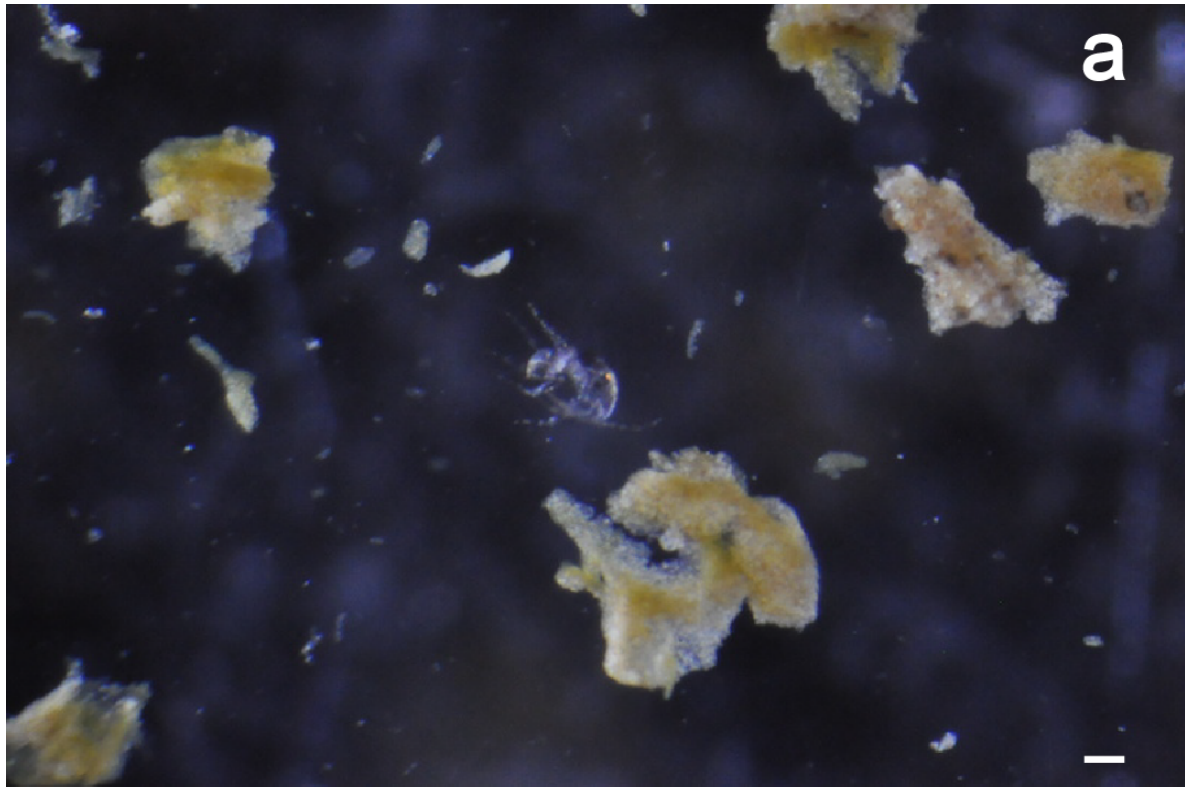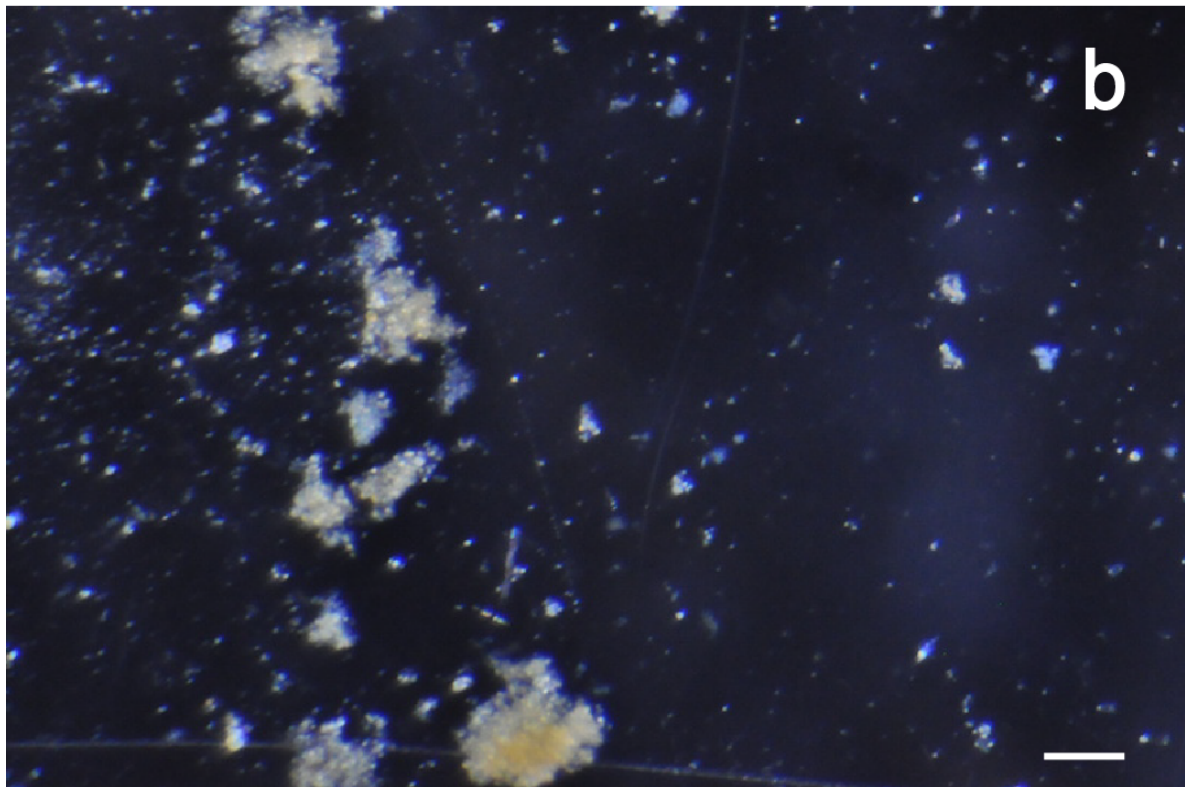

Figure S2. Microscopic images of a) periphyton and b) the gut contents of *E. latifolium* collected in April 2013. White scale bars at bottom right indicate 100  $\mu\text{m}$ .

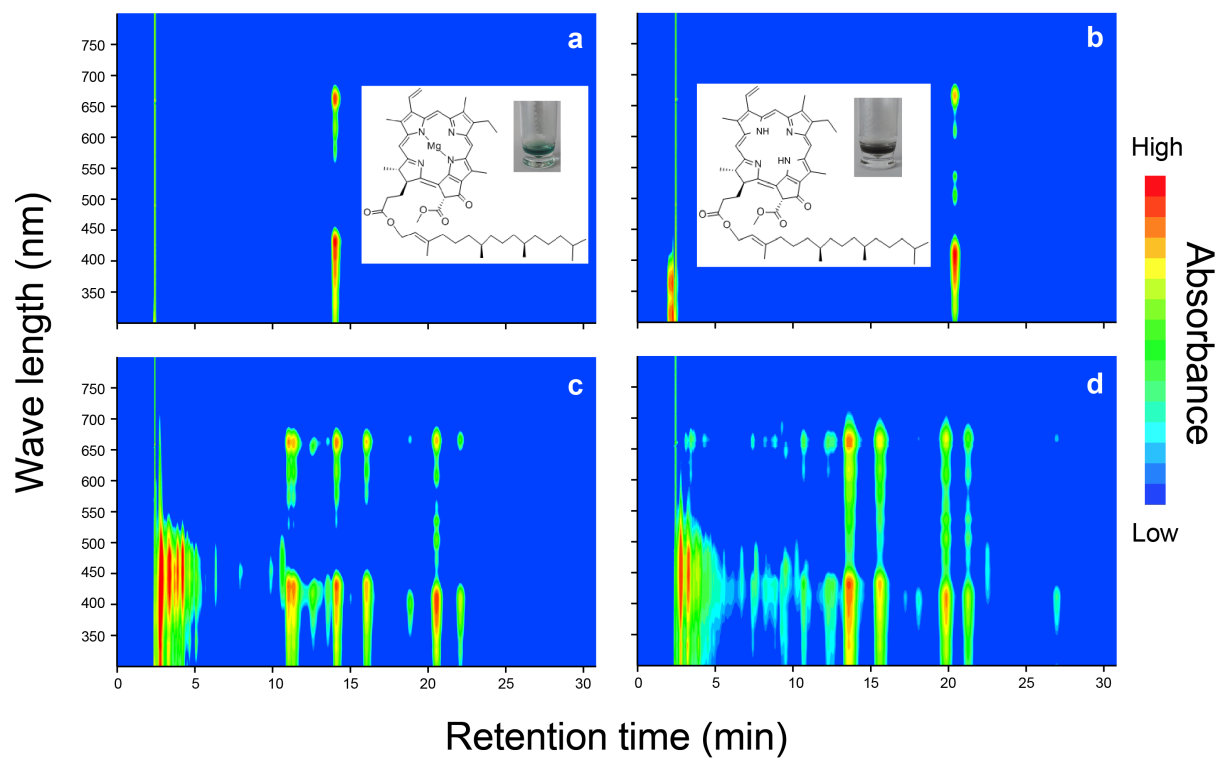

1  
2  
3  
4  
5

Figure S3. Three-dimensional chromatograms of laboratory standards for a) chlorophyll *a*, and b) phaeophytin *a* and periphyton collected from the Seri River in c) April, and d) October 2013.
